# Supplementary material
Source: PubMed Central journal article supplement (PMC3382483)
Supplement: 1121231109_pnas.201121231SI.pdf [file 1121231109_pnas.201121231SI.pdf]

# Supporting Information

Cook et al. 10.1073/pnas.1121231109

## SI Materials and Methods

**Infections.** Mice were infected with *L. sigmodontis* for 10 d or with *S. mansoni* for 8 wk, as previously described (1, 2).

**BMDC Stimulation and DC: T-Cell Coculture.** In selected experiments, DCs were exposed to endotoxin-free soluble egg Ag [SEA, 25  $\mu\text{g}/\text{mL}$ , prepared as described elsewhere (3)], heat-killed *Propionibacterium acnes* (Pa, 10  $\mu\text{g}/\text{mL}$ ), lipopolysaccharide (LPS, 250  $\text{ng}/\text{mL}$ , Sigma) or CpG oligodeoxynucleotide 1826 (ODN 1826, 5  $\mu\text{g}/\text{mL}$ , InvivoGen). To assess further activation, CD40 ligation with  $\alpha\text{CD40}$  mAb was carried out as previously described (4). In vitro coculture polarization experiments were performed with 50,000 IL10-eGFP<sup>+</sup>CD4<sup>+</sup> or KN2 CD4<sup>+</sup>. T cells were cultured in 96-well plates for 3–4 d with 2,500 RELM $\alpha$  sufficient or *Retnla*<sup>-/-</sup> BMDCs, 1  $\mu\text{g}/\text{mL}$  anti-CD3, with or without IL-4 (20  $\text{ng}/\text{mL}$ ). For CFSE dilution assays, CD4<sup>+</sup> OT-II TCR Transgenic T cells were purified from spleen and LN using CD4<sup>+</sup> Dynabeads (Invitrogen) following the manufacturer's protocol. T cells were labeled with 5  $\mu\text{M}$  CFSE (Invitrogen) for 15 min at 37  $^{\circ}\text{C}$ . Excess CFSE was allowed to leach from the cells before culture with  $5 \times 10^4$  WT, *Retnla*<sup>-/-</sup>, or *Il4ra*<sup>-/-</sup> BMDCs in the presence of 0.01  $\mu\text{g}/\text{mL}$  OVA<sub>323–339</sub> or 5  $\mu\text{g}/\text{mL}$  OVA protein (Sigma), which had been endotoxin depleted in-house. Cultures were incubated at 37  $^{\circ}\text{C}$  for 4 d before assessment of CFSE dilution by flow cytometry.

**Flow Cytometry.** In some experiments, cells were first stained with LiveDead aqua (Invitrogen). Following FcR-Block (2.4G2), cells were surface stained using the following mAb: CD4-PE, CD11c-APC/eFluor780, MHCII-PerCP/Cy5.5, CD11b-eFluor450, CD80-APC, CD40-PE, CD19-AlexaFluor700, CD86-FITC, Dectin1-APC, IL-4R $\alpha$ -biotin, SiglecF-PE, F4/80-PE/Cy7, Gr1-PerCP/Cy5.5, and HuCD2-APC. For intracellular staining, cells were fixed in 1% PFA, permeabilized using Cytoperm (BD PharMingen), and stained with anti-RELM $\alpha$ , and anti-Ym1 biotin followed by AlexaFluor 488-conjugated anti-rabbit Ab and streptavidin-APC. To assess Ag uptake,  $2 \times 10^5$  BMDCs were incubated with

200  $\mu\text{g}$  FITC-conjugated dextran (Sigma) for 30 min at 37  $^{\circ}\text{C}$  or on ice before acquisition.

**Splenic DC Purification.** Splenic DCs were enriched from five to six naive C57BL/6 mice using NycoDenz density gradient separation and CD11c<sup>hi</sup>B220<sup>-</sup> cDCs were sorted from B220<sup>+</sup>CD11c<sup>mid</sup> pDCs using a BD FACs Aria II. After sorting,  $5 \times 10^4$  DCs were cultured overnight with 20  $\text{ng}/\text{mL}$  IL-4, before RNA extraction, reverse transcription, and quantification of transcript levels using quantitative PCR.

**Arginase Activity Assay.** Arginase activity was measured as described previously (5). One unit of arginase enzyme activity is defined as the amount of enzyme that catalyzed the formation of 1  $\mu\text{mol}$  urea per minute at 37  $^{\circ}\text{C}$ .

**Quantitative PCR.** Relative quantification of the gene of interest was performed by qPCR analysis using Roche Light Cyclers 480, with LightCycler SYBR Green I Master mix, compared with a serially diluted standard of pooled cDNA. Expression was normalized to hypoxanthine-guanine phosphoribosyltransferase (*Hprt*).

Primers were as follows:

*Hprt*-F: 5'-TCCTCCTCAGACCGCTTTT-3',  
*Hprt*-R: 5'-CCTGGTTCATCATCGCTAATC-3',  
*Retnla*-F: 5'-TATGAACAGATGGGCCTCCT-3',  
*Retnla*-R: 5'-GGCAGTTGCAAGTATCTCCAC-3',  
*Chi3l3*-F: 5'-GAACACTGAGCTAAAACTCTCCTG-3',  
*Chi3l3*-R: 5'-GACCATGGCACTGAACGAG-3',  
*Clec7a*-F: 5'-ATGGTTCTGGGAGGATGGAT-3',  
*Clec7a*-R: 5'-GCTTTCCTGGGGAGCTGTAT-3',  
*Mrc1*-F: 5'-TCATTGGAAGATCCACTCTGG-3',  
*Mrc1*-R: 5'-CAGCGCTTGTGATCTTTCATTATAG-3',  
*Arg1*-F: 5'-GTCTGTGGGAAAGCCAAT-3',  
*Arg1*-R: 5'-GCTTCCAACCTGCCAGACTGT-3',  
*Ccl24*-F: 5'-GCAGCATCTGTCCCAAGG-3',  
*Ccl24*-R: 5'-GCAGCTTGGGGTTCAGTACA-3'.

- Jenkins SJ, et al. (2011) Local macrophage proliferation, rather than recruitment from the blood, is a signature of TH2 inflammation. *Science* 332:1284–1288.
- Phythian-Adams AT, et al. (2010) CD11c depletion severely disrupts Th2 induction and development in vivo. *J Exp Med* 207:2089–2096.
- MacDonald AS, Straw AD, Bauman B, Pearce EJ (2001) CD8- dendritic cell activation status plays an integral role in influencing Th2 response development. *J Immunol* 167: 1982–1988.

- Perona-Wright G, et al. (2009) A pivotal role for CD40-mediated IL-6 production by dendritic cells during IL-17 induction in vivo. *J Immunol* 182:2808–2815.
- Mylonas KJ, Nair MG, Prieto-Lafuente L, Paape D, Allen JE (2009) Alternatively activated macrophages elicited by helminth infection can be reprogrammed to enable microbial killing. *J Immunol* 182:3084–3094.

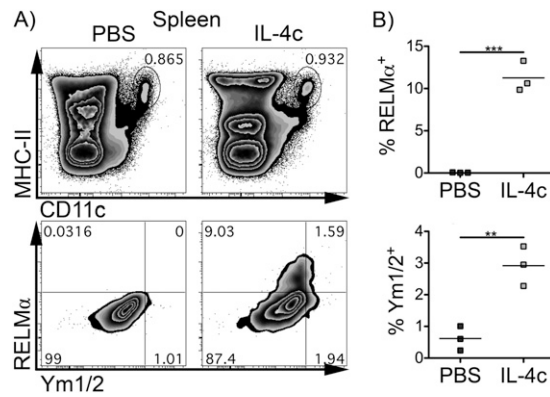

**Fig. S1.** IL-4c injection induces alternative activation of splenic DCs. Splenic DCs (MHC-II<sup>+</sup> CD11c<sup>hi</sup>) from PBS- or IL-4c-treated mice (2 × 5 μg, d 0 and d 2) were harvested at d 4 and stained for intracellular expression of RELMα and Ym1/2 (A and B). Data are representative of at least three experiments. Graphs show percent expression for individual mice, three per group.

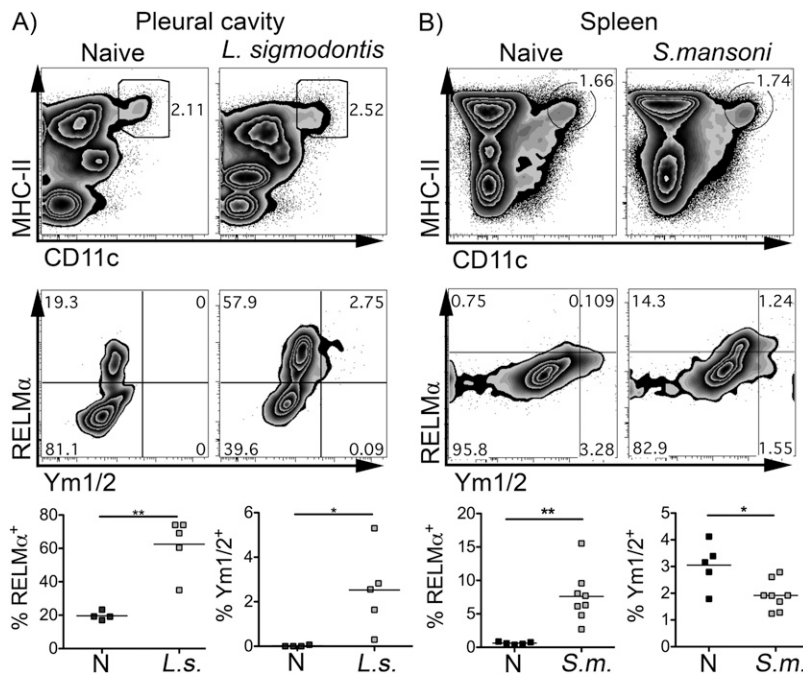

**Fig. S2.** Parasitic helminth infection induces alternative activation of DCs at multiple tissue sites. Pleural cavity (A) or splenic (B) DCs (MHC-II<sup>+</sup> CD11c<sup>hi</sup>) from naive mice infected with *L. sigmodontis* (*L.s.*) (A) or *S. mansoni* (*S.m.*) (B) were stained for intracellular expression of RELMα and Ym1/2. Data are representative of three to six experiments. Graphs show percent expression for individual mice, four to eight per group.
